# Supplementary material for: IgG4-related Breast Disease: Review of the Literature
Source: PubMed Central journal article supplement (PMC11524419; doi:10.5041/rmmj.10532), 2024-10-28
Supplement: rmmj-15-4-e0018AM.pdf [file rmmj-15-4-e0018AM.pdf]

*This appendix has been provided by the authors for the benefit of readers*

# Supplement to IgG4-related Breast Disease: Review of the Literature

Jeries H, Braun-Moscovici Y, Balbir-Gurman A. IgG4-related Breast Disease: Review of the Literature. Rambam Maimonides Med J 2024;15 (4):e0018. Review. doi:10.5041/RMMJ.10532

Table 1. Clinical, Imaging, and Pathological Data of IgG4-BD Cases Reported in the Literature.

| Pt. #<br>(age, y/sex) <sup>ref.</sup> | Presentation                                                    | Imaging                                                                                                                                      | Biopsy                | Serum<br>IgG4<br>(mg/dL) | Histopathology                                                                                           | %<br>IgG4 <sup>+</sup> /IgG <sup>+</sup> | Treatment                            | Outcome                                          |
|---------------------------------------|-----------------------------------------------------------------|----------------------------------------------------------------------------------------------------------------------------------------------|-----------------------|--------------------------|----------------------------------------------------------------------------------------------------------|------------------------------------------|--------------------------------------|--------------------------------------------------|
| Pt. 1<br>(24/F) <sup>14</sup>         | Pain and redness in right breast                                | <b>US:</b> Breast abscess                                                                                                                    | Vacuum and excisional | 142                      | Focal architectural distortion, dense inflammatory infiltrate with dense sclerotic stroma. No granulomas | 45                                       | Prednisone 1 mg/kg<br>MTX 15 mg/week | Resolution within 3 months                       |
| Pt. 2<br>(70/F) <sup>15</sup>         | Axillary lymph nodes, soft egg-sized tender mass in left breast | <b>MG:</b> Breast lump<br><b>US:</b> Hypochoic mass with irregular border and poor Doppler signal<br><b>MRI:</b> Breast mass—suspected tumor | Yes, type not defined | —                        | Mixed T and B lymphocytic and plasma cell infiltration with interstitial fibrosis                        | 40                                       | Prednisone 10 mg/day                 | Lesion resolution stable during 4-year follow-up |
| Pt. 3<br>(56/F) <sup>16</sup>         | Palpable non-painful lump in left breast                        | <b>US:</b> Ill-defined hypochoic mass with low vascularity; no shadowing or calcification<br><b>MRI:</b> Non-mass enhancement                | Yes, type not defined | —                        | IgG4-related sclerosing mastitis                                                                         | —                                        | —                                    | —                                                |

| Pt. #<br>(age, y/sex) <sup>ref.</sup> | Presentation                                                                           | Imaging                                                                                                                                                        | Biopsy                    | Serum<br>IgG4<br>(mg/dL) | Histopathology                                                                                          | %<br>IgG4 <sup>+</sup> /IgG <sup>+</sup> | Treatment                                                     | Outcome                                           |
|---------------------------------------|----------------------------------------------------------------------------------------|----------------------------------------------------------------------------------------------------------------------------------------------------------------|---------------------------|--------------------------|---------------------------------------------------------------------------------------------------------|------------------------------------------|---------------------------------------------------------------|---------------------------------------------------|
| Pt. 4<br>(52/F) <sup>17</sup>         | Asymptomatic left breast lump on screening mammography                                 | <b>MG:</b> Small circumscribed opacity<br><b>US:</b> Small solid avascular hypoechoic nodule with hyperechogenic tiny foci                                     | Core                      | 131                      | Scattered stromal cells with chronic dense inflammatory infiltrates and prominent IgG4 expression       | —                                        | Excision                                                      | —                                                 |
| Pt. 5<br>(71/F) <sup>18</sup>         | Asymptomatic left breast mass on CT (screening for IgG4-RD because of eye involvement) | <b>MG and US:</b> Breast mass—suspected tumor<br><b>MRI:</b> Bordered breast mass with early enhancement—suspected tumor                                       | Excision of large nodules | 1430                     | Dense lymphoplasmacytic infiltration with CD20 <sup>+</sup> B cells and CD3 <sup>+</sup> T cells        | 76                                       | Prednisone 22.5 mg/day, tapered to 5 mg/day as maintenance    | Improved within 3 months; stabilized after 1 year |
| Pt. 6<br>(84/F) <sup>19</sup>         | Palpable unilateral non-painful lump (unknown side)                                    | <b>MG:</b> Breast mass without calcifications or architectural distortion<br><b>US:</b> Well circumscribed round hypoechoic mass with vascular flow on Doppler | Excision of large nodules | —                        | Fibro-inflammatory lesion with dense lymphoplasmacytic infiltration, numerous plasma cells, eosinophils | 50                                       | Mass excision                                                 | —                                                 |
| Pt. 7<br>(56/F) <sup>20</sup>         | Palpable bilateral non-painful lump                                                    | <b>MG:</b> Mass-like densities, both breasts<br><b>US:</b> Irregular ill-defined hypoechoic masses<br><b>PET:</b> Mildly increased metabolic activity          | Core biopsy               | Elevated                 | Extensive stromal fibrosis with robust IgG4 <sup>+</sup> plasma cells in breast and dermal tissue       | 40                                       | Steroids                                                      | Orbital disease resolution; stable breast mass    |
| Pt. 8<br>(56/F) <sup>21</sup>         | Recurrent mastitis (unknown side)                                                      | —                                                                                                                                                              | Excision of large nodules | 920                      | IgG4 infiltrates                                                                                        | —                                        | Prednisone 40 mg/day tapered to 10 mg/day maintenance therapy | Symptom resolution; stable after 1 year           |
| Pt. 9<br>(41/F) <sup>22</sup>         | Asymptomatic right breast lump on screening mammography                                | <b>MG and US:</b> Small mass                                                                                                                                   | Biopsy                    | 39.4                     | Sclerotic stroma with dense lymphoplasmacytic infiltrates                                               | 43                                       | Observation                                                   | —                                                 |
| Pt. 10<br>(54/F) <sup>23</sup>        | Palpable non-painful left breast lump                                                  | <b>US:</b> Irregular ill-defined hypoechoic masses<br><b>CT:</b> Axillary nodes enlargement                                                                    | Biopsy                    | 3320                     | Mixed B, T, and plasma cell infiltrates with interstitial fibrosis                                      | 40                                       | Prednisone 30 mg/day for 4 weeks and maintenance therapy      | Decrease in breast mass                           |

| Pt. #<br>(age, y/sex) <sup>ref.</sup> | Presentation                                        | Imaging                                                                                                                              | Biopsy            | Serum<br>IgG4<br>(mg/dL) | Histopathology                                                                                                                                                           | %<br>IgG4 <sup>+</sup> /IgG <sup>+</sup> | Treatment                 | Outcome                                         |
|---------------------------------------|-----------------------------------------------------|--------------------------------------------------------------------------------------------------------------------------------------|-------------------|--------------------------|--------------------------------------------------------------------------------------------------------------------------------------------------------------------------|------------------------------------------|---------------------------|-------------------------------------------------|
| Pt. 11<br>(48/F) <sup>24</sup>        | Palpable bilateral non-painful lump                 | <b>MG:</b> Breast nodules<br><b>US:</b> Hypoechoic nodules with lobular margins<br><b>MRI:</b> Multiple lesions, both breasts        | US-guided biopsy  | 650                      | Dense mass, lymphoplasmacytic infiltrates, prominent stromal sclerosis, loss of breast lobules; mostly B-CD20 <sup>+</sup> and T CD3 <sup>+</sup> lymphocytes            | 65                                       | Excision of large nodules | Stable state                                    |
| Pt. 12<br>(51/F) <sup>24</sup>        | Palpable right breast non-painful lump              | <b>MG:</b> Breast nodules                                                                                                            | Core biopsy       | 3900                     | Dense mass, lymphoplasmacytic infiltrates, prominent stromal sclerosis, loss of breast lobules; mostly B-CD20 <sup>+</sup> and T CD3 <sup>+</sup> lymphocytes            | 85                                       | Excision of large nodules | Stable state                                    |
| Pt. 13<br>(37/F) <sup>24</sup>        | Palpable right breast non-painful lump              | <b>MG:</b> Breast nodules                                                                                                            | Core biopsy       | —                        | Dense mass, lymphoplasmacytic infiltrates, prominent stromal sclerosis, loss of breast lobules; mostly B-CD20 <sup>+</sup> and T CD3 <sup>+</sup> lymphocytes. Phlebitis | 82                                       | Core needle biopsy        | Breast mass resolved, lymphadenopathy unchanged |
| Pt. 14<br>(54/F) <sup>24</sup>        | Palpable right breast non-painful lump              | <b>MG and US:</b> Fibro-adenoma-like lesions                                                                                         | Performed         | —                        | Dense mass, lymphoplasmacytic infiltrates, prominent stromal sclerosis, loss of breast lobules; mostly B-CD20 <sup>+</sup> and T CD3 <sup>+</sup> lymphocytes            | 49                                       | Excision of large nodules | Stable state                                    |
| Pt. 15<br>(62/F) <sup>25</sup>        | Painful right breast mass                           | <b>US:</b> Hypoechoic mass                                                                                                           | US-guided         | —                        | Granulomatous lobular mastitis with giant cells, sclerosis, and IgG4 <sup>+</sup>                                                                                        | —                                        | —                         | —                                               |
| Pt. 16<br>(66/F) <sup>25</sup>        | Painful right breast mass                           | <b>US:</b> Ill-defined hypoechoic mass                                                                                               | Surgical excision | 189                      | —                                                                                                                                                                        | —                                        | —                         | —                                               |
| Pt. 17<br>(49/F) <sup>26</sup>        | Multiple painless masses in left breast             | <b>US:</b> Hypoechoic uncompressible mass, surrounding architecture disturbance without acoustic shadowing                           | Biopsy excision   | 390                      | Sclerotic lesions with low cellularity and plasma cell-rich inflammatory infiltrate                                                                                      | 51                                       | Steroids                  | Partial regression                              |
| Pt. 18<br>(47/F) <sup>27</sup>        | Asymptomatic breast lump (unknown side)             | —                                                                                                                                    | —                 | 140                      | Reactive lymphoid follicles, fibrosis, elevated eosinophils and plasma cells, no phlebitis                                                                               | 30                                       | —                         | Recurrent orbital mass                          |
| Pt. 19<br>(61/F) <sup>28</sup>        | Asymptomatic right breast lesion on planned PET-FDG | <b>MG and US:</b> Performed, no description<br><b>PET-CT:</b> Increased metabolic activity in the breast (planned exam for lymphoma) | —                 | 321                      | Sclerotic lesions with low cellularity and plasma cell-rich inflammatory infiltrate: lymphocytes, plasma cells, eosinophils, histiocytes. Carcinoma <i>in situ</i>       | 85                                       | Excision                  | —                                               |

| Pt. #<br>(age, y/sex) <sup>ref.</sup> | Presentation                                             | Imaging                                                                                                                      | Biopsy    | Serum<br>IgG4<br>(mg/dL) | Histopathology                                                                                                    | %<br>IgG4 <sup>+</sup> /IgG <sup>+</sup> | Treatment | Outcome |
|---------------------------------------|----------------------------------------------------------|------------------------------------------------------------------------------------------------------------------------------|-----------|--------------------------|-------------------------------------------------------------------------------------------------------------------|------------------------------------------|-----------|---------|
| Pt. 20<br>(59/M) <sup>28</sup>        | Asymptomatic left breast lesion on planned total body CT | <b>MG:</b> Multinodular irregular mass<br><b>CT:</b> For prostatic cancer assessment, breast mass                            | –         | –                        | Stromal sclerosis with dense plasma cells (>30 HPF) infiltrate, positive for IgG4                                 | –                                        | Excision  | –       |
| Pt. 21<br>(48/M) <sup>29</sup>        | Asymptomatic right breast lump                           | <b>MG:</b> Breast mass involving pectoral muscle with skin thickening<br><b>US:</b> Heterogeneous mass with mild vascularity | –         | 1220                     | Fibrotic tissue with storiform pattern and dense lymphoplasmacytic infiltrates, several eosinophils, no granuloma | 51                                       | Excision  | –       |
| Pt. 22<br>(66/F) <sup>30</sup>        | Asymptomatic left breast lump                            | <b>MG:</b> Breast mass—suspected tumor                                                                                       | –         | 179                      | Storiform fibrosis, dense lymphoplasmacytic infiltrates, obliterative phlebitis                                   | 63.9                                     | Excision  | –       |
| Pt. 23<br>(45/F) <sup>30</sup>        | Asymptomatic right breast lump                           | <b>MG:</b> Breast mass—suspected tumor                                                                                       | –         | 308                      | Storiform fibrosis, dense lymphoplasmacytic infiltrates, obliterative phlebitis                                   | 67.3                                     | Excision  | –       |
| Pt. 24<br>(37/F) <sup>31</sup>        | Asymptomatic breast lump (unknown side)                  | <b>MG:</b> Breast lesion                                                                                                     | Performed | 166                      | Dense lymphoplasmacytic infiltrates, storiform fibrosis, obliterative phlebitis, giant cells                      | 75.1                                     | –         | –       |
| Pt. 25<br>(–/–) <sup>31</sup>         | Asymptomatic breast lump (unknown side)                  | –                                                                                                                            | –         | 99.3                     | Dense lymphoplasmacytic infiltrates, storiform fibrosis, obliterative phlebitis                                   | 47.5                                     | –         | –       |
| Pt. 26<br>(–/–) <sup>31</sup>         | Asymptomatic breast lump (unknown side)                  | –                                                                                                                            | –         | 68.3                     | Dense lymphoplasmacytic infiltrates, storiform fibrosis                                                           | 45.1                                     | –         | –       |
| Pt. 27<br>(–/–) <sup>31</sup>         | Asymptomatic breast lump (unknown side)                  | –                                                                                                                            | –         | 64                       | Dense lymphoplasmacytic infiltrates, storiform fibrosis, obliterative phlebitis                                   | 74.1                                     | –         | –       |
| Pt. 28<br>(–/–) <sup>31</sup>         | Asymptomatic breast lump (unknown side)                  | –                                                                                                                            | –         | 52.7                     | Dense lymphoplasmacytic infiltrates, storiform fibrosis, histiocytes                                              | 57                                       | –         | –       |
| Pt. 29<br>(–/–) <sup>31</sup>         | Asymptomatic breast lump (unknown side)                  | –                                                                                                                            | –         | 48.7                     | Dense lymphoplasmacytic infiltrates, storiform fibrosis                                                           | 59.6                                     | –         | –       |
| Pt. 30<br>(–/–) <sup>31</sup>         | Asymptomatic breast lump (unknown side)                  | –                                                                                                                            | –         | 42.3                     | Dense lymphoplasmacytic infiltrates, storiform fibrosis, obliterative phlebitis, histiocytes                      | 32                                       | –         | –       |
| Pt. 31<br>(–/–) <sup>31</sup>         | Asymptomatic breast lump (unknown side)                  | –                                                                                                                            | –         | 41.7                     | Dense lymphoplasmacytic infiltrates, storiform fibrosis                                                           | 40.2                                     | –         | –       |

| Pt. #<br>(age, y/sex) <sup>ref.</sup> | Presentation                                  | Imaging                                                                                                                      | Biopsy               | Serum<br>IgG4<br>(mg/dL) | Histopathology                                                                                                                                                                     | %<br>IgG4 <sup>+</sup> /IgG <sup>+</sup> | Treatment | Outcome       |
|---------------------------------------|-----------------------------------------------|------------------------------------------------------------------------------------------------------------------------------|----------------------|--------------------------|------------------------------------------------------------------------------------------------------------------------------------------------------------------------------------|------------------------------------------|-----------|---------------|
| Pt. 32<br>(-/-) <sup>31</sup>         | Asymptomatic<br>breast lump<br>(unknown side) | —                                                                                                                            | —                    | 41                       | Dense lymphoplasmacytic<br>infiltrates, storiform fibrosis                                                                                                                         | 40.5                                     | —         | —             |
| Pt. 33<br>(-/-) <sup>31</sup>         | Asymptomatic<br>breast lump<br>(unknown side) | —                                                                                                                            | —                    | 31                       | Dense lymphoplasmacytic<br>infiltrates, storiform fibrosis,<br>obliterative phlebitis                                                                                              | 62                                       | —         | —             |
| Pt. 34<br>(-/-) <sup>31</sup>         | Asymptomatic<br>breast lump<br>(unknown side) | —                                                                                                                            | —                    | 28.7                     | Dense lymphoplasmacytic<br>infiltrates, storiform fibrosis,<br>obliterative phlebitis, histiocytes                                                                                 | 18.9                                     | —         | —             |
| Pt. 35<br>(-/-) <sup>31</sup>         | Asymptomatic<br>breast lump<br>(unknown side) | —                                                                                                                            | —                    | 27.3                     | Dense lymphoplasmacytic<br>infiltrates, storiform fibrosis,<br>obliterative phlebitis                                                                                              | 49.4                                     | —         | —             |
| Pt. 36<br>(-/-) <sup>31</sup>         | Asymptomatic<br>breast lump<br>(unknown side) | —                                                                                                                            | —                    | 26.3                     | Dense lymphoplasmacytic<br>infiltrates, storiform fibrosis,<br>obliterative phlebitis                                                                                              | 61.2                                     | —         | —             |
| Pt. 37<br>(-/-) <sup>31</sup>         | Asymptomatic<br>breast lump<br>(unknown side) | —                                                                                                                            | —                    | 19.7                     | Dense lymphoplasmacytic<br>infiltrates, storiform fibrosis,<br>obliterative phlebitis                                                                                              | 34.1                                     | —         | —             |
| Pt. 38<br>(-/-) <sup>31</sup>         | Asymptomatic<br>breast lump<br>(unknown side) | —                                                                                                                            | —                    | 17.7                     | Dense lymphoplasmacytic<br>infiltrates, storiform fibrosis,<br>histiocytes                                                                                                         | 49.5                                     | —         | —             |
| Pt. 39<br>(-/-) <sup>31</sup>         | Asymptomatic<br>breast lump<br>(unknown side) | —                                                                                                                            | —                    | 16.7                     | Dense lymphoplasmacytic<br>infiltrates, storiform fibrosis,<br>obliterative phlebitis                                                                                              | 42                                       | —         | —             |
| Pt. 40<br>(-/-) <sup>31</sup>         | Asymptomatic<br>breast lump<br>(unknown side) | —                                                                                                                            | —                    | 12                       | Dense lymphoplasmacytic<br>infiltrates, storiform fibrosis,<br>obliterative phlebitis, histiocytes                                                                                 | 46.2                                     | —         | —             |
| Pt. 41<br>(82/F) <sup>32</sup>        | Asymptomatic<br>right breast lump             | <b>MG:</b> Ill-defined focal<br>asymmetric infiltrates, no<br>calcifications<br><b>US:</b> Ill-defined<br>heterogeneous mass | Core<br>biopsy       | —                        | Polyclonal T and B cell infiltrates,<br>macrophages, plasma cells,<br>histiocytes, lymphoplasmacytic<br>infiltrates with fibrosis and sclerosis                                    | —                                        | —         | —             |
| Pt. 42<br>(65/F) <sup>33</sup>        | Asymptomatic<br>right breast lump             | —                                                                                                                            | Excisional<br>biopsy | 150                      | Robust lymphocytes and plasma<br>cells, diffuse fibrosis, IgG4 <sup>+</sup> cells<br>172/HPF, few obliterative phlebitis<br>with concomitant features of Rosai-<br>Dorfman disease | 82                                       | Excision  | No recurrence |

| Pt. #<br>(age, y/sex) <sup>ref.</sup> | Presentation                      | Imaging                                                                                                                                                                                                                                                                                                                                                                  | Biopsy                                                        | Serum<br>IgG4<br>(mg/dL) | Histopathology                                                                                                                                                                                                                           | %<br>IgG4 <sup>+</sup> /IgG <sup>+</sup> | Treatment                                                                 | Outcome       |
|---------------------------------------|-----------------------------------|--------------------------------------------------------------------------------------------------------------------------------------------------------------------------------------------------------------------------------------------------------------------------------------------------------------------------------------------------------------------------|---------------------------------------------------------------|--------------------------|------------------------------------------------------------------------------------------------------------------------------------------------------------------------------------------------------------------------------------------|------------------------------------------|---------------------------------------------------------------------------|---------------|
| Pt. 43<br>(78/F) <sup>33</sup>        | Asymptomatic<br>right breast lump | <b>PET:</b> Right breast mass and<br>right axillary lymph nodes<br>with high FDG uptake                                                                                                                                                                                                                                                                                  | Excision                                                      | 18                       | Robust lymphocytes and plasma<br>cells, diffuse fibrosis, IgG4 <sup>+</sup> cells<br>118/HPF, few obliterative phlebitis<br>with concomitant features of Rosai-<br>Dorfman disease                                                       | 53                                       | Excision                                                                  | No recurrence |
| Pt. 44<br>(54/F) <sup>34</sup>        | Asymptomatic<br>right breast lump | <b>MG:</b> Irregular-shaped,<br>dense lesion with indistinct<br>margins<br><b>US:</b> Low-echoic lesions<br><b>CT:</b> For eyelids assess-<br>ment, breast mass noted<br><b>MRI:</b> Segmental<br>enhancement                                                                                                                                                            | Core<br>needle<br>biopsy                                      | 217                      | Irregular stromal cell proliferation<br>associated with severe<br>lymphoplasmacytic infiltration,<br>adenosis, and intraductal papilloma<br>surrounded by fibrosis; diffusely<br>distributed IgG4 <sup>+</sup> plasma cells              | —                                        | Prednisone 40<br>mg/day tapered<br>to 10 mg/day<br>maintenance<br>therapy | No recurrence |
| Pt. 45<br>(43/F) <sup>35</sup>        | Asymptomatic<br>right breast lump | <b>US:</b> Low-echoic breast<br>mass with abundant<br>vascular signal<br><b>PET:</b> Right breast mass and<br>right axillary lymph nodes<br>with high FDG uptake<br><b>MRI:</b> Irregular shaped con-<br>trasted mass with<br>enhancement                                                                                                                                | Extraction                                                    | 517                      | Dense fibrosis with abundance of<br>plasma cells                                                                                                                                                                                         | 70                                       | Prednisone 30<br>mg/day tapered<br>to 5 mg/day<br>maintenance<br>therapy  | No recurrence |
| Pt. 46<br>(62/F) <sup>36</sup>        | Asymptomatic<br>right breast lump | <b>MG:</b> Nodule, right lower<br>portion<br><b>US:</b> Hyperechoic nodule in<br>right lower portion                                                                                                                                                                                                                                                                     | Performed<br>for diag-<br>nosis and<br>surgical<br>extraction | —                        | Large polygonal histiocytes with<br>zonal proliferation pattern,<br>lymphoplasmacytic cells with<br>stromal fibrosis with concomitant<br>features of Rosai-Dorfman disease;<br>positive reactions for IgG and IgG4<br>in fibrotic stroma | 56.7                                     | Surgical<br>extraction                                                    | No recurrence |
| Pt. 47<br>(69/F) <sup>37</sup>        | Asymptomatic left<br>breast lump  | <b>MG:</b> Bilateral diffuse<br>calcifications and multiple<br>circumscribed masses in<br>the medial left breast<br><b>US:</b> Multiple masses in the<br>left breast and chest wall;<br>abnormal left axillary<br>lymph nodes<br><b>MRI:</b> Multiple heteroge-<br>neous enhancing masses in<br>left breast and chest wall<br>surrounding and involving<br>multiple ribs | US-guided                                                     | 191                      | Mixed inflammatory infiltrate with<br>background fibrosis; no staining for<br>IgG4 was performed                                                                                                                                         | —                                        | —                                                                         | —             |

| Pt. #<br>(age, y/sex) <sup>ref.</sup> | Presentation                   | Imaging                                                                                | Biopsy     | Serum<br>IgG4<br>(mg/dL) | Histopathology                                                                                                                                                                                                                           | %<br>IgG4 <sup>+</sup> /IgG <sup>+</sup> | Treatment | Outcome |
|---------------------------------------|--------------------------------|----------------------------------------------------------------------------------------|------------|--------------------------|------------------------------------------------------------------------------------------------------------------------------------------------------------------------------------------------------------------------------------------|------------------------------------------|-----------|---------|
| Pt. 48<br>(46/F) <sup>38</sup>        | Indurative left<br>breast lump | <b>MG and US:</b> Ill-defined<br>nodule<br><b>MRI:</b> Breast mass with<br>enhancement | Excisional | 185                      | Irregular proliferation of stromal<br>cells associated with severe<br>lymphoplasmacytic infiltration,<br>obliterative phlebitis, and<br>eosinophils; many plasma cells<br>within the lesion immunohistochem-<br>ically positive for IgG4 | —                                        | —         | —       |

—, not known; CT, computed tomography; F, female; FDG, fluorodeoxyglucose; HPF, high-power field; M, male; MG, mammography; MRI, magnetic resonance imaging; MTX, methotrexate; PC, plasma cells; PET, positron emission tomography; US, ultrasonography.
